# Supplementary material
Source: PubMed Central journal article supplement (PMC3249072)
Supplement: supp_M111.272732_jbc.M111.272732-1.pdf [file supp_M111.272732_jbc.M111.272732-1.pdf]

## SUPPLEMENTAL DATA

### Identification of a new fatty acid synthesis-transport machinery at the peroxisomal membrane

Merle Hillebrand, Søren W. Gersting, Amelie S. Lotz-Havla, Annika Schäfer, Hendrik Rosewich, Oliver Valerius, Ania C. Muntau, Jutta Gärtner

**Supplementary Table 1. Peptides of ALDP and PMP70 specific binding partners (ACLY, FASN) identified by subsequent LCMS analysis.**

| Reference                    | Peptide                   | MH+        | z | <i>P</i> (pro)  | Protein Score |
|------------------------------|---------------------------|------------|---|-----------------|---------------|
| Scans                        |                           |            |   | <i>P</i> (pep)  | Xscore        |
| gi 603074 gb AAB60340.1 ACLY |                           |            |   | <b>2,80E-09</b> | <b>266,24</b> |
| 1015-1017                    | R.AVQGMLDFDYVCSR.D        | 1660,74573 | 2 | 2,80E-09        | 4,70          |
| 1087                         | K.LGLVGVNLTLDGVK.S        | 1397,83618 | 2 | 5,84E-09        | 4,06          |
| 959                          | R.EAYPEEAYIADLDAK.S       | 1697,79053 | 2 | 1,13E-08        | 4,10          |
| 882                          | -.SGGMSNELNNIISR.-        | 1491,72205 | 2 | 4,00E-07        | 3,66          |
| 1092                         | -.LGLVGVNLTLDGVK.-        | 1397,83618 | 2 | 7,12E-07        | 3,76          |
| 965                          | R.KHPEVDVLINFASLR.S       | 1737,96460 | 3 | 3,01E-06        | 3,83          |
| 1139                         | -.TIAIIAEGIPEALTR.-       | 1567,90540 | 2 | 3,28E-06        | 4,32          |
| 1012                         | K.MIVVLGEIGGTEEYK.I       | 1637,84546 | 2 | 4,04E-06        | 4,71          |
| 1003                         | K.DGVYVLDLAAK.V           | 1163,63062 | 2 | 7,63E-06        | 3,04          |
| 958                          | -.KHPEVDVLINFASLR.-       | 1737,96460 | 3 | 1,04E-05        | 4,18          |
| 773                          | R.EGDYVLFHHEGGVDVGDVDAK.A | 2258,03613 | 2 | 1,81E-05        | 4,00          |
| 447                          | K.HLLVHAPDDKK.E           | 1272,70593 | 2 | 4,09E-05        | 3,15          |
| 819                          | -.AIVWGMQTR.-             | 1061,55603 | 2 | 1,55E-04        | 2,53          |
| 1417                         | K.DLVSSLTSGLLTIGDR.F      | 1646,89600 | 2 | 2,38E-04        | 4,74          |
| 872                          | -.GVTIIGPATVGGIKPGCFK.-   | 1872,04114 | 2 | 2,53E-04        | 3,52          |
| 749                          | R.SGGM*SNELNNIISR.T       | 1507,72142 | 2 | 2,53E-04        | 3,72          |
| 744                          | R.SAYDSTMETM*NYAQIR.T     | 1896,81472 | 2 | 4,21E-04        | 3,51          |
| 482                          | -.RGGPNYQEGLR.-           | 1246,62866 | 2 | 1,19E-03        | 3,60          |
| 1000                         | -.DGVYVLDLAAK.-           | 1163,63062 | 1 | 1,59E-03        | 2,72          |
| 468                          | K. AKPAM*PQDSVPSR.S       | 1496,75707 | 2 | 1,75E-03        | 2,74          |
| 1447                         | -.DLVSSLTSGLLTIGDR.-      | 1646,89600 | 2 | 2,35E-03        | 3,68          |
| 997                          | K.IGNTGGMLDNILASK.L       | 1503,78357 | 2 | 5,33E-03        | 4,24          |

|                                        |                           |            |   |                 |               |
|----------------------------------------|---------------------------|------------|---|-----------------|---------------|
| 717                                    | R.TTDGVYEGVAIGGDR.Y       | 1509,71802 | 2 | 1,14E-02        | 3,84          |
| 744                                    | -.SAYDSTM*ETMNQAQIR.-     | 1896,81472 | 2 | 2,02E-02        | 2,74          |
| 1018                                   | R.DEPSVAAMVYPFTGDHK.Q     | 1863,85815 | 2 | 3,18E-02        | 2,52          |
| 1280                                   | K.IIIGGSIANFTNVAATFK.G    | 1950,10583 | 2 | 5,90E-02        | 3,47          |
| 1182                                   | -.WGDIEFPPFGR.-           | 1417,68994 | 2 | 6,16E-02        | 3,29          |
| 580-582                                | K.LYRPGSVAYVSR.S          | 1367,74304 | 3 | 6,42E-02        | 3,41          |
| <b>gi 68533031 dbj BAE06070.1 FASN</b> |                           |            |   | <b>1,77E-08</b> | <b>238,23</b> |
| 786                                    | R.FPQLDSTSFANSR.D         | 1469,70190 | 2 | 1,77E-08        | 3,54          |
| 756                                    | R.QGVQVQVSTSNISLEGAR.G    | 1960,00940 | 2 | 2,85E-07        | 4,62          |
| 849                                    | K.VLQGDLMNVYR.D           | 1406,74609 | 2 | 3,01E-07        | 3,88          |
| 749                                    | K.VLQGDLM*NVYR.D          | 1422,74545 | 2 | 3,28E-06        | 3,64          |
| 911                                    | K.VVQVLAEEPEAVLK.G        | 1622,93640 | 2 | 3,41E-06        | 3,66          |
| 726                                    | R.LQVVDQPLPVR.G           | 1263,74194 | 2 | 1,52E-05        | 3,65          |
| 761                                    | -.SLLVNPEGPTLM*R.-        | 1442,77166 | 2 | 1,64E-05        | 2,96          |
| 763                                    | R.AFEVSENGNLVVSGK.V       | 1549,78564 | 2 | 2,18E-05        | 3,18          |
| 561                                    | K.ADEASELACPTPK.E         | 1388,63623 | 2 | 3,96E-05        | 3,04          |
| 893                                    | R.SEGVVAVLLTK.K           | 1115,66699 | 2 | 2,01E-04        | 3,82          |
| 917                                    | -.VVVQVLAEEPEAVLK.-       | 1622,93640 | 3 | 2,24E-04        | 4,45          |
| 569                                    | K.VVEVLAGHGLYSR.I         | 1536,82813 | 2 | 4,11E-04        | 3,05          |
| 527                                    | -.DPSQQLPR.-              | 1069,52722 | 2 | 4,98E-04        | 2,95          |
| 854                                    | K.MVVVPLDGAQIPR.D         | 1352,73547 | 2 | 5,54E-04        | 2,76          |
| 828                                    | -.VAAAVDLIK.-             | 1012,64014 | 2 | 5,59E-04        | 2,95          |
| 653                                    | -.GNAGQSNYGFANSAMER.-     | 1773,76086 | 2 | 7,46E-04        | 4,19          |
| 668                                    | K.EDGLAQQTQLNLR.S         | 1613,82422 | 2 | 7,55E-04        | 4,12          |
| 691                                    | R.GTHTGVWVGVSGSETSEALSR.D | 2117,02588 | 3 | 3,13E-03        | 3,78          |
| 856                                    | R.SLLVNPEGPTLMR.L         | 1426,77222 | 2 | 3,91E-03        | 3,15          |
| 791                                    | -.FPQLDSTSFANSR.-         | 1469,70190 | 2 | 3,92E-03        | 3,23          |
| 499                                    | -.VSVHVIEGDHR.-           | 1247,64917 | 2 | 9,72E-03        | 2,43          |
| 673                                    | -.EDGLAQQTQLNLR.-         | 1613,82422 | 2 | 5,44E-02        | 3,19          |
| 574                                    | K.AQVADVVSRSR.W           | 1043,58435 | 2 | 8,21E-02        | 3,10          |
| 823                                    | R.VYATILNAGTNTDGFKE       | 1684,85413 | 2 | 2,42E-01        | 3,45          |

Peptides of ACLY and FASN obtained by LCMS are listed including the molecular weight of charged peptides MH<sup>+</sup>, charge state *z* of peptides, probability value of the protein *P* (pro) and of the peptides *P* (pep), and the cross correlation scores *X* (Xscore).

**Supplementary Table 2. BRET ratios derived from PPI studies among ALDP, PMP70, ACLY, FASN, FATP4, and ACC1.**

| PPI        | protein 1  | protein2  | experiment1       | experiment 2      | mean  |
|------------|------------|-----------|-------------------|-------------------|-------|
| ALDP-FASN  | Rluc-ALDP  | YFP-FASN  | 0.11              | 0.09              | 0.10  |
|            | Rluc-ALDP  | FASN-YFP  | 0.05              | 0.05              | 0.05  |
|            | ALDP-Rluc  | YFP-FASN  | 0.07              | 0.08              | 0.08  |
|            | ALDP-Rluc  | FASN-YFP  | 0.04              | 0.03              | 0.04  |
|            | Rluc-FASN  | YFP-ALDP  | 0.02              | 0.02              | 0.02  |
|            | Rluc-FASN  | ALDP-YFP  | 0.02              | 0.02              | 0.02  |
|            | FASN-Rluc  | YFP-ALDP  | 0.11              | 0.08              | 0.09  |
|            | FASN-Rluc  | ALDP-YFP  | 0.05              | 0.00              | 0.03  |
| PMP70-FASN | Rluc-PMP70 | YFP-FASN  | 0.08              | 0.14              | 0.11  |
|            | Rluc-PMP70 | FASN-YFP  | 0.04              | 0.03              | 0.03  |
|            | PMP70-Rluc | YFP-FASN  | <i>low signal</i> | <i>low signal</i> |       |
|            | PMP70-Rluc | FASN-YFP  | <i>low signal</i> | <i>low signal</i> |       |
|            | Rluc-FASN  | YFP-PMP70 | -0.01             | -0.02             | -0.01 |
|            | Rluc-FASN  | PMP70-YFP | 0.00              | -0.03             | -0.02 |
|            | FASN-Rluc  | YFP-PMP70 | 0.05              | 0.08              | 0.07  |
|            | FASN-Rluc  | PMP70-YFP | 0.00              | 0.01              | 0.00  |
| ALDP-ACLY  | Rluc-ALDP  | YFP-ACLY  | 0.11              | 0.09              | 0.10  |
|            | Rluc-ALDP  | ACLY-YFP  | 0.15              | 0.11              | 0.13  |
|            | ALDP-Rluc  | YFP-ACLY  | 0.13              | 0.10              | 0.11  |
|            | ALDP-Rluc  | ACLY-YFP  | 0.17              | 0.12              | 0.14  |
|            | Rluc-ACLY  | YFP-ALDP  | 0.04              | 0.03              | 0.03  |
|            | Rluc-ACLY  | ALDP-YFP  | 0.05              | 0.03              | 0.04  |
|            | ACLY-Rluc  | YFP-ALDP  | 0.05              | 0.03              | 0.04  |
|            | ACLY-Rluc  | ALDP-YFP  | 0.04              | 0.07              | 0.06  |
| PMP70-ACLY | Rluc-PMP70 | YFP-ACLY  | 0.14              | 0.18              | 0.16  |
|            | Rluc-PMP70 | ACLY-YFP  | 0.18              | 0.19              | 0.19  |
|            | PMP70-Rluc | YFP-ACLY  | 0.28              | <i>low signal</i> | 0.28  |
|            | PMP70-Rluc | ACLY-YFP  | 0.38              | 0.39              | 0.39  |
|            | Rluc-ACLY  | YFP-PMP70 | 0.02              | 0.04              | 0.03  |
|            | Rluc-ACLY  | PMP70-YFP | 0.04              | 0.02              | 0.03  |
|            | ACLY-Rluc  | YFP-PMP70 | 0.03              | 0.08              | 0.05  |

|             |            |           |                   |                   |      |
|-------------|------------|-----------|-------------------|-------------------|------|
|             | ACLY-Rluc  | PMP70-YFP | 0.02              | 0.03              | 0.02 |
| FASN-ACLY   | Rluc-FASN  | YFP-ACLY  | 0.06              | 0.06              | 0.06 |
|             | Rluc-FASN  | ACLY-YFP  | 0.05              | 0.05              | 0.05 |
|             | FASN-Rluc  | YFP-ACLY  | 0.12              | 0.15              | 0.14 |
|             | FASN-Rluc  | ACLY-YFP  | 0.14              | 0.19              | 0.17 |
|             | Rluc-ACLY  | YFP-FASN  | 0.06              | 0.05              | 0.05 |
|             | Rluc-ACLY  | FASN-YFP  | 0.03              | 0.02              | 0.02 |
|             | ACLY-Rluc  | YFP-FASN  | 0.06              | <i>low signal</i> | 0.06 |
|             | ACLY-Rluc  | FASN-YFP  | 0.02              | <i>low signal</i> | 0.02 |
| ALDP-PMP70  | Rluc-ALDP  | YFP-PMP70 | 0.06              | 0.05              | 0.06 |
|             | Rluc-ALDP  | PMP70-YFP | 0.04              | 0.03              | 0.04 |
|             | ALDP-Rluc  | YFP-PMP70 | 0.07              | 0.05              | 0.06 |
|             | ALDP-Rluc  | PMP70-YFP | 0.04              | 0.03              | 0.04 |
|             | Rluc-PMP70 | YFP-ALDP  | 0.13              | 0.12              | 0.12 |
|             | Rluc-PMP70 | ALDP-YFP  | 0.09              | 0.02              | 0.05 |
|             | PMP70-Rluc | YFP-ALDP  | <i>low signal</i> | <i>low signal</i> |      |
|             | PMP70-Rluc | ALDP-YFP  | <i>low signal</i> | <i>low signal</i> |      |
| PMP70-PMP70 | Rluc-PMP70 | YFP-PMP70 | 0.12              | 0.10              | 0.11 |
|             | Rluc-PMP70 | PMP70-YFP | 0.02              | 0.04              | 0.03 |
|             | PMP70-Rluc | YFP-PMP70 | <i>low signal</i> | <i>low signal</i> |      |
|             | PMP70-Rluc | PMP70-YFP | <i>low signal</i> | <i>low signal</i> |      |
| ALDP-ALDP   | Rluc-ALDP  | YFP-ALDP  | 0.09              | 0.076             | 0.09 |
|             | Rluc-ALDP  | ALDP-YFP  | 0.10              | 0.095             | 0.10 |
|             | ALDP-Rluc  | YFP-ALDP  | 0.16              | 0.206             | 0.16 |
|             | ALDP-Rluc  | ALDP-YFP  | 0.53              | 0.496             | 0.51 |
| ACLY-ACLY   | Rluc-ACLY  | YFP-ACLY  | 0.19              | 0.16              | 0.17 |
|             | Rluc-ACLY  | ACLY-YFP  | 0.18              | 0.16              | 0.17 |
|             | ACLY-Rluc  | YFP-ACLY  | 0.73              | 0.67              | 0.70 |
|             | ACLY-Rluc  | ACLY-YFP  | 0.41              | 0.42              | 0.42 |
| FASN-FASN   | Rluc-FASN  | YFP-FASN  | 0.06              | 0.06              | 0.06 |
|             | Rluc-FASN  | FASN-YFP  | 0.01              | 0.02              | 0.02 |
|             | FASN-Rluc  | YFP-FASN  | 0.11              | 0.11              | 0.11 |
|             | FASN-Rluc  | FASN-YFP  | 0.03              | 0.05              | 0.04 |
| ALDP-FATP4  | Rluc-ALDP  | YFP-FATP4 | 0.08              | 0.08              | 0.08 |
|             | Rluc-ALDP  | FATP4-YFP | 0.04              | 0.02              | 0.03 |

|             |            |           |                   |                   |      |
|-------------|------------|-----------|-------------------|-------------------|------|
|             | ALDP-Rluc  | YFP-FATP4 | 0.11              | 0.12              | 0.11 |
|             | ALDP-Rluc  | FATP4-YFP | 0.06              | 0.07              | 0.07 |
|             | Rluc-FATP4 | YFP-ALDP  | 0.06              | 0.02              | 0.04 |
|             | Rluc-FATP4 | ALDP-YFP  | 0.05              | 0.00              | 0.02 |
|             | FATP4-Rluc | YFP-ALDP  | 0.07              | <i>low signal</i> | 0.07 |
|             | FATP4-Rluc | ALDP-YFP  | 0.06              | <i>low signal</i> | 0.06 |
| PMP70-FATP4 | Rluc-PMP70 | YFP-FATP4 | 0.19              | 0.11              | 0.15 |
|             | Rluc-PMP70 | FATP4-YFP | 0.07              | 0.06              | 0.07 |
|             | PMP70-Rluc | YFP-FATP4 | <i>low signal</i> | <i>low signal</i> |      |
|             | PMP70-Rluc | FATP4-YFP | <i>low signal</i> | <i>low signal</i> |      |
|             | Rluc-FATP4 | YFP-PMP70 | 0.05              | -0.01             | 0.02 |
|             | Rluc-FATP4 | PMP70-YFP | 0.05              | 0.04              | 0.05 |
|             | FATP4-Rluc | YFP-PMP70 | 0.07              | <i>low signal</i> | 0.07 |
|             | FATP4-Rluc | PMP70-YFP | 0.04              | -0.03             | 0.00 |
| FASN-FATP4  | Rluc-FASN  | YFP-FATP4 | 0.03              | 0.03              | 0.03 |
|             | Rluc-FASN  | FATP4-YFP | 0.02              | 0.01              | 0.01 |
|             | FASN-Rluc  | YFP-FATP4 | 0.04              | 0.10              | 0.07 |
|             | FASN-Rluc  | FATP4-YFP | 0.02              | 0.02              | 0.02 |
|             | Rluc-FATP4 | YFP-FASN  | 0.05              | 0.04              | 0.04 |
|             | Rluc-FATP4 | FASN-YFP  | 0.03              | 0.02              | 0.02 |
|             | FATP4-Rluc | YFP-FASN  | 0.10              | 0.10              | 0.10 |
|             | FATP4-Rluc | FASN-YFP  | 0.03              | 0.02              | 0.02 |
| ACLY-FATP4  | Rluc-ACLY  | YFP-FATP4 | 0.02              | 0.03              | 0.03 |
|             | Rluc-ACLY  | FATP4-YFP | 0.02              | 0.02              | 0.02 |
|             | ACLY-Rluc  | YFP-FATP4 | 0.02              | 0.02              | 0.02 |
|             | ACLY-Rluc  | FATP4-YFP | 0.00              | 0.00              | 0.00 |
|             | Rluc-FATP4 | YFP-ACLY  | 0.05              | 0.04              | 0.05 |
|             | Rluc-FATP4 | ACLY-YFP  | 0.04              | 0.04              | 0.04 |
|             | FATP4-Rluc | YFP-ACLY  | 0.06              | 0.06              | 0.06 |
|             | FATP4-Rluc | ACLY-YFP  | 0.07              | 0.09              | 0.08 |
| FATP4-FATP4 | Rluc-FATP4 | YFP-FATP4 | 0.14              | 0.09              | 0.14 |
|             | Rluc-FATP4 | FATP4-YFP | 0.03              | 0.02              | 0.03 |
|             | FATP4-Rluc | YFP-FATP4 | 0.19              | 0.10              | 0.19 |
|             | FATP4-Rluc | FATP4-YFP | 0.05              | 0.04              | 0.05 |
| ALDP-ACC    | Rluc-ALDP  | YFP-ACC   | 0.01              | 0.02              | 0.02 |

|           |            |           |                   |                   |      |
|-----------|------------|-----------|-------------------|-------------------|------|
|           | Rluc-ALDP  | ACC-YFP   | 0.00              | 0.02              | 0.01 |
|           | ALDP-Rluc  | YFP-ACC   | 0.01              | 0.03              | 0.02 |
|           | ALDP-Rluc  | ACC-YFP   | 0.01              | 0.02              | 0.01 |
|           | Rluc-ACC   | YFP-ALDP  | 0.01              | 0.03              | 0.02 |
|           | Rluc-ACC   | ALDP-YFP  | 0.00              | 0.01              | 0.01 |
|           | ACC-Rluc   | YFP-ALDP  | 0.01              | 0.02              | 0.02 |
|           | ACC-Rluc   | ALDP-YFP  | 0.00              | 0.02              | 0.01 |
| <hr/>     |            |           |                   |                   |      |
| PMP70-ACC | Rluc-PMP70 | YFP-ACC   | 0.06              | 0.03              | 0.05 |
|           | Rluc-PMP70 | ACC-YFP   | 0.03              | 0.03              | 0.03 |
|           | PMP70-Rluc | YFP-ACC   | <i>low signal</i> | <i>low signal</i> |      |
|           | PMP70-Rluc | ACC-YFP   | <i>low signal</i> | <i>low signal</i> |      |
|           | Rluc-ACC   | YFP-PMP70 | 0.01              | 0.02              | 0.01 |
|           | Rluc-ACC   | PMP70-YFP | 0.01              | 0.02              | 0.01 |
|           | ACC-Rluc   | YFP-PMP70 | <i>low signal</i> | <i>low signal</i> |      |
|           | ACC-Rluc   | PMP70-YFP | <i>low signal</i> | 0.02              | 0.02 |
| <hr/>     |            |           |                   |                   |      |
| ACLY-ACC  | Rluc-ACLY  | YFP-ACC   | 0.01              | 0.03              | 0.02 |
|           | Rluc-ACLY  | ACC-YFP   | 0.02              | 0.03              | 0.02 |
|           | ACLY-Rluc  | YFP-ACC   | 0.01              | 0.03              | 0.02 |
|           | ACLY-Rluc  | ACC-YFP   | 0.02              | 0.03              | 0.02 |
|           | Rluc-ACC   | YFP-ACLY  | 0.01              | 0.03              | 0.02 |
|           | Rluc-ACC   | ACLY-YFP  | 0.01              | 0.03              | 0.02 |
|           | ACC-Rluc   | YFP-ACLY  | <i>low signal</i> | 0.19              | 0.17 |
|           | ACC-Rluc   | ACLY-YFP  | 0.18              | 0.19              | 0.19 |
| <hr/>     |            |           |                   |                   |      |
| FASN-ACC  | Rluc-FASN  | YFP-ACC   | 0.01              | 0.03              | 0.02 |
|           | Rluc-FASN  | ACC-YFP   | 0.02              | 0.03              | 0.02 |
|           | FASN-Rluc  | YFP-ACC   | 0.03              | 0.01              | 0.02 |
|           | FASN-Rluc  | ACC-YFP   | 0.02              | 0.03              | 0.02 |
|           | Rluc-ACC   | YFP-FASN  | 0.03              | 0.03              | 0.03 |
|           | Rluc-ACC   | FASN-YFP  | 0.00              | 0.02              | 0.01 |
|           | ACC-Rluc   | YFP-FASN  | <i>low signal</i> | <i>low signal</i> |      |
|           | ACC-Rluc   | FASN-YFP  | <i>low signal</i> | 0.06              | 0.06 |
| <hr/>     |            |           |                   |                   |      |
| FATP4-ACC | Rluc-FATP4 | YFP-ACC   | 0.02              | 0.03              | 0.03 |
|           | Rluc-FATP4 | ACC-YFP   | 0.01              | 0.03              | 0.02 |
|           | FATP4-Rluc | YFP-ACC   | 0.04              | 0.05              | 0.04 |
|           | FATP4-Rluc | ACC-YFP   | 0.02              | 0.02              | 0.02 |

|             |             |            |                   |                   |       |
|-------------|-------------|------------|-------------------|-------------------|-------|
|             | Rluc-ACC    | YFP-FATP4  | 0.04              | 0.07              | 0.05  |
|             | Rluc-ACC    | FATP4-YFP  | 0.01              | 0.02              | 0.02  |
|             | ACC-Rluc    | YFP-FATP4  | <i>low signal</i> | <i>low signal</i> |       |
|             | ACC-Rluc    | FATP4-YFP  | <i>low signal</i> | 0.02              | 0.02  |
| ACC-ACC     | Rluc-ACC    | YFP-ACC    | 0.10              | 0.1162            | 0.10  |
|             | Rluc-ACC    | ACC-YFP    | 0.02              | 0.0321            | 0.02  |
|             | ACC-Rluc    | YFP-ACC    | <i>low signal</i> | <i>low signal</i> |       |
|             | ACC-Rluc    | ACC-YFP    | <i>low signal</i> | <i>low signal</i> |       |
| ALDP-IL10RB | Rluc-ALDP   | YFP-IL10RB | 0.01              | -0.02             | -0.01 |
|             | Rluc-ALDP   | IL10RB-YFP | -0.01             | -0.02             | -0.01 |
|             | ALDP-Rluc   | YFP-IL10RB | 0.01              | 0.00              | 0.00  |
|             | ALDP-Rluc   | IL10RB-YFP | -0.01             | -0.01             | -0.01 |
|             | Rluc-IL10RB | YFP-ALDP   | 0.02              | 0.00              | 0.01  |
|             | Rluc-IL10RB | ALDP-YFP   | -0.01             | -0.01             | -0.01 |
|             | IL10RB-Rluc | YFP-ALDP   | 0.02              | <i>low signal</i> | 0.02  |
|             | IL10RB-Rluc | ALDP-YFP   | -0.01             | <i>low signal</i> | -0.01 |
| ALDP-ACADS  | Rluc-ALDP   | YFP-ACADS  | 0.01              | -0.01             | 0.01  |
|             | Rluc-ALDP   | ACADS-YFP  | <i>low signal</i> | 0.01              | 0.01  |
|             | ALDP-Rluc   | YFP-ACADS  | 0.05              | <i>low signal</i> | 0.05  |
|             | ALDP-Rluc   | ACADS-YFP  | 0.01              | 0.03              | 0.02  |
|             | Rluc-ACADS  | YFP-ALDP   | -0.01             | -0.03             | -0.02 |
|             | Rluc-ACADS  | ALDP-YFP   | -0.01             | -0.03             | -0.02 |
|             | ACADS-Rluc  | YFP-ALDP   | -0.02             | 0.01              | 0.00  |
|             | ACADS-Rluc  | ALDP-YFP   | <i>low signal</i> | -0.02             | -0.02 |

BRET ratios tested in 8 possible tag combinations are listed for 2 independent experiments. BRET ratios above the threshold for a positive PPI are highlighted in grey.

### Supplementary Table 3. BRET saturation experiments.

|                     | ALDP -<br>ALDP | PMP70 -<br>PMP70 | PMP70 -<br>ALDP | PMP70 -<br>FASN | ALDP -<br>FASN | PMP70 -<br>ACLY | ALDP -<br>ACLY | ACLY -<br>FASN |
|---------------------|----------------|------------------|-----------------|-----------------|----------------|-----------------|----------------|----------------|
| BRET <sub>max</sub> | 0.16 ± 0.02    | 0.33 ± 0.01      | 0.25 ± 0.04     | 0.35 ± 0.02     | 0.27 ± 0.03    | 0.50 ± 0.01     | 0.49 ± 0.01    | 0.47 ± 0.01    |
| <i>P</i> -value     |                | < 0.001          | < 0.001         |                 | < 0.01         |                 | ns             | -              |
| BRET <sub>50</sub>  | 0.85 ± 0.19    | 1.22 ± 0.16      | 2.05 ± 0.60     | 1.81 ± 0.33     | 2.02 ± 0.46    | 0.59 ± 0.02     | 4.25 ± 0.2     | 3.83 ± 0.29    |
| <i>P</i> -value     |                | ns               | < 0.01          |                 | ns             |                 | < 0.001        | -              |

BRET saturation experiments were performed to determine relative binding affinities (BRET<sub>50</sub>, acceptor to donor ratio at half-maximum BRET ratio) and maximal BRET ratios as a measure of the distance of BRET tags (BRET<sub>max</sub>). Calculation of the maximal BRET ratios at saturation level (BRET<sub>max</sub>) and the relative affinity index (BRET<sub>50</sub>) derived from BRET saturation experiments, given as mean ± corresponding standard error of the mean (SEM). Significance for the difference between the homomeric ALDP transporter, the homomeric PMP70 or heteromeric PMP70-ALDP transporter, as well as for the interaction between PMP70 or ALDP with FASN and for PMP70 or ALDP with ACLY, respectively, were calculated by one-way ANOVA and a Dunnett's post test (ns, not significant). BRET<sub>50</sub> and BRET<sub>max</sub> values are displayed as means ± SD of *n* = 3 independent experiments.

**Supplementary Table 4. PPI network of ALDP, PMP70, ACLY, FASN and FATP4 and first order interactions.**

|       | BIOGRID | HPRD    | Manually recrated | PMID     |
|-------|---------|---------|-------------------|----------|
| FATP4 | GT197   |         | GT197             | 20562859 |
|       | S1R     |         | S1R               | 17353931 |
| PMP70 | ALDP    | ALDP    | ALDP              | 10551832 |
|       |         | PMP70   | PMP70             | 10551832 |
|       |         | ALDR    | ALDR              | 10551832 |
|       | PEX19   | PEX19   | PEX19             | 10777694 |
|       | USP50   |         |                   |          |
|       | USP32   |         |                   |          |
|       | CLN3    |         | CLN3              | 20562859 |
|       | BRF-2   |         | BRF-2             | 17353931 |
|       | mPR     |         | mPR               | 17353931 |
|       | PRL-R   |         | PRL-R             | 17353931 |
|       | PELO    |         | PELO              | 17353931 |
|       | MLF2    |         | MLF2              | 17353931 |
|       | MEST    |         | MEST              | 17353931 |
|       |         | COL6A2  |                   |          |
|       |         | RIP5    | 17353931          |          |
| ALDP  |         | ALDP    | ALDP              | 10551832 |
|       | PMP70   | PMP70   | PMP70             | 10551832 |
|       | PEX19   | PEX19   | PEX19             | 10777694 |
|       | ALDR    | ALDR    | ALDR              | 10551832 |
| ACLY  |         | ACLY    | ACLY              | 9116495  |
|       |         | PKA C-a |                   |          |
|       | AMPKb   |         | AMPKb             | 17353931 |
|       | GSK-3b  | GSK-3b  | GSK-3b            | 17353931 |



|      |         |       |         |          |
|------|---------|-------|---------|----------|
|      | NDKB    |       | NDKB    | 17353931 |
|      | Hrs     |       | Hrs     | 19019082 |
|      | IkBKE   |       | IkBKE   | 17353931 |
|      | bHLHe33 |       | bHLHe33 | 17353931 |
|      | FASN    | FASN  | FASN    | 11248039 |
| FASN | EWS     | EWSR1 | EWS     | 16189514 |
|      |         | DRG-1 | DRG-1   | 17220478 |

Interaction partners of ALDP, PMP70, ACLY, FASN and FATP4 identified by database analysis (HPRD, BioGRID) with subsequent manual reuration are listed and corresponding PubMed identification numbers (PMID) are given.

### Supplementary Table 5. Oligonucleotide sequences used for construction of plasmids.

| Name               | Sequence (5' - 3')                                            | Restriction enzyme |
|--------------------|---------------------------------------------------------------|--------------------|
| C-term. ALDP for.2 | <i>tttgaattcaataactcagagtcagatgcagaggcc</i>                   | EcoRI              |
| ALDPStop-NotI rev  | <i>taagcggccgctcaggtggaggcaccctggaggcc</i>                    | NotI               |
| ALDP up            | <i>ttactcgagcaatgccggtgctctccagggccgg</i>                     | XhoI               |
| ALDP down          | <i>ttaagcttcaggtggaggcaccctggaggcc</i>                        | HindIII            |
| C-term. PMP70 for  | <i>ttaggatccgattgtctcatcctcgacatctc</i>                       | Bam HI             |
| PMP70Not I rev     | <i>ttagcggcccetaagagccaaactcaactgtatc</i>                     | NotI               |
| PMP70 up           | <i>taatccggaatggcgcccttcagcaagtacttg</i>                      | BspEI              |
| PMP70 down         | <i>ttaggatccctaagagccaaactcaactgtatc</i>                      | Bam HI             |
| ACLY for           | <i>ttagaattcaaatgtcgccaaggcaatttc</i>                         | EcoRI              |
| ACLY rev           | <i>taagcggccgcttacatgctcatgtgttc</i>                          | NotI               |
| FATP4myc for       | <i>ttagaattcatgctcttgagcctctctg</i>                           | EcoRI              |
| FATP4myc rev       | <i>taaaagctttcagcttctctcgcctgcc</i>                           | HindIII            |
| FATP4 attB1 for    | <i>ggggacaagttgtacaaaaagcaggctttatgctgcttgagcctctctg</i>      |                    |
| FATP4 attB1 rev    | <i>ggggaccactttgtacaagaaagctgggtcagcttctctcgcctgcc</i>        |                    |
| ACLY attB1 for     | <i>ggggacaagttgtacaaaaagcaggctacacatgctcgccaaggcaatttcag</i>  |                    |
| ACLY attB2 rev     | <i>ggggaccactttgtacaagaaagctgggtacatgctcatgtgttcggaa</i>      |                    |
| ALDP attB1 for     | <i>gggacaagttgtacaaaaagcaggcttgacatgccggtgctctccaggcc</i>     |                    |
| ALDP attB2 rev     | <i>gggaccactttgtacaagaaagctgggtgaattccggtggaggcaccctggagg</i> |                    |

Sequences are shown from 5' to 3' end. Restriction sites in the sequence of the cloning oligonucleotides are shown in italic and restriction enzymes are listed.
